# Supplementary material for: Characterization of Bee Pollen: Physico-Chemical Properties, Headspace Composition and FTIR Spectral Profiles
Source: MDPI journal article supplement (doi:10.3390/foods10092103), 2021-09-06
Supplement: s1 [file s1]

**Supplementary Material S2.** Descriptive sheets for unifloral bee pollen collected from three Croatian regions (Continental - CR, Mountain - MR, Adriatic - AR): visual identity (colour), nutritional value (content of ash, proteins, total lipids, total sugars, fructose, glucose and sucrose; expressed as a percentage of the total weight), and FTIR-ATR spectra (fingerprint region: 1800 - 650  $\text{cm}^{-1}$ )

\*unifloral bee pollens are listed chronologically according to the blooming appearance of the corresponding plant species

### 1. Willow (*Salix* spp.); collected from: CR, MR

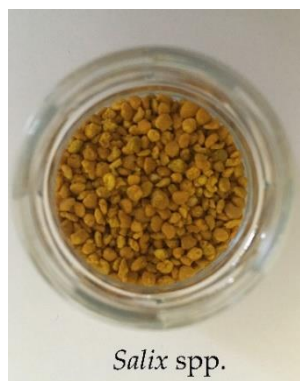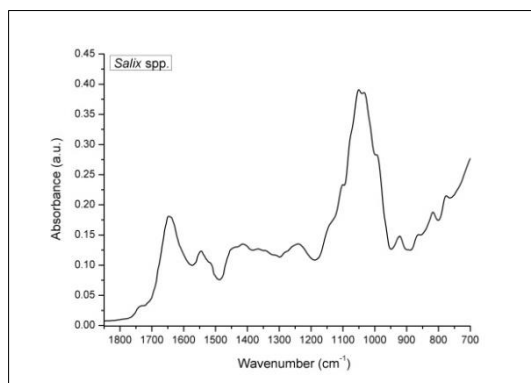

|                  |                   |
|------------------|-------------------|
| Botanical origin | <i>Salix</i> spp. |
| Colour           | Light orange      |
| Ash (%)          | 2.26              |
| Proteins (%)     | 15.87             |
| Total lipids (%) | 8.20              |
| Total sugars (%) | 30.72             |
| Fructose (%)     | 14.84             |
| Glucose (%)      | 12.58             |
| Sucrose (%)      | 10.39             |

### 2. Oak (*Quercus* spp.); collected from: CR

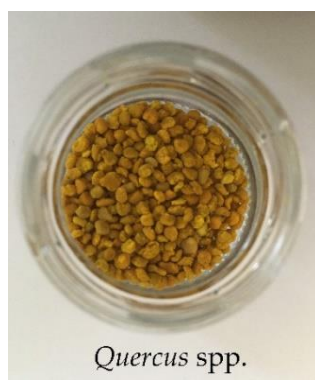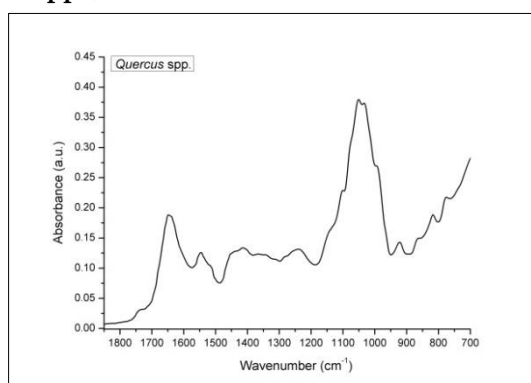

|                  |                     |
|------------------|---------------------|
| Botanical origin | <i>Quercus</i> spp. |
| Colour           | Light orange        |
| Ash (%)          | 2.44                |
| Proteins (%)     | 17.63               |
| Total lipids (%) | 6.67                |
| Total sugars (%) | 40.28               |
| Fructose (%)     | 14.84               |
| Glucose (%)      | 12.24               |
| Sucrose (%)      | 13.20               |

### 3. Horse chestnut (*Aesculus hippocastanum* L.); collected from: CR

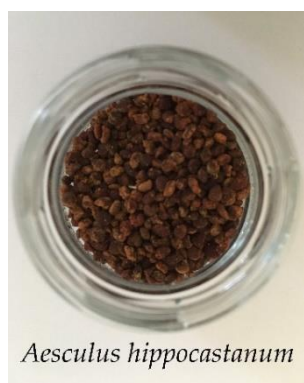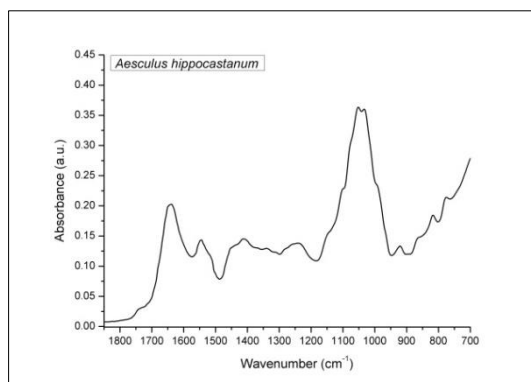

|                  |                                  |
|------------------|----------------------------------|
| Botanical origin | <i>Aesculus hippocastanum</i> L. |
| Colour           | Terracotta red                   |
| Ash (%)          | 2.53                             |
| Proteins (%)     | 23.40                            |
| Total lipids (%) | 5.32                             |
| Total sugars (%) | 21.48                            |
| Fructose (%)     | 9.33                             |
| Glucose (%)      | 7.69                             |
| Sucrose (%)      | 4.46                             |

### 4. Blackthorn (*Prunus spinosa* L.); collected from: CR, MR

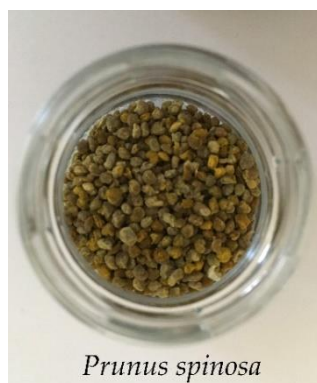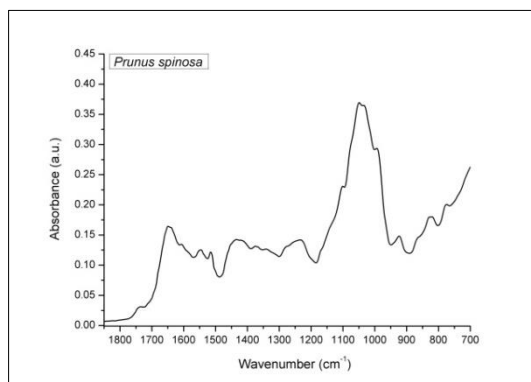

|                  |                          |
|------------------|--------------------------|
| Botanical origin | <i>Prunus spinosa</i> L. |
| Colour           | Oker – light brown       |
| Ash (%)          | 2.60                     |
| Proteins (%)     | 20.81                    |
| Total lipids (%) | 7.47                     |
| Total sugars (%) | 35.80                    |
| Fructose (%)     | 10.17                    |
| Glucose (%)      | 8.60                     |
| Sucrose (%)      | 17.03                    |

5. Common dandelion (*Taraxacum officinale* L.); collected from: CR, MR

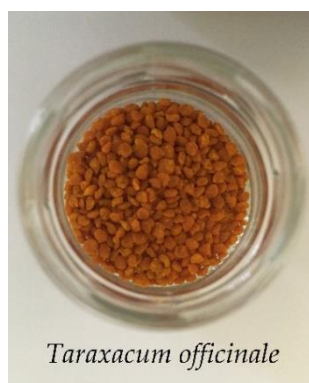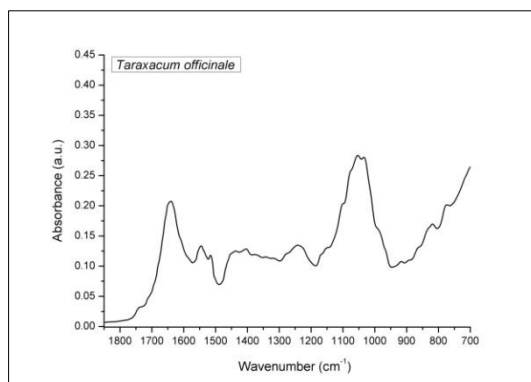

|                  |                                |
|------------------|--------------------------------|
| Botanical origin | <i>Taraxacum officinale</i> L. |
| Colour           | Orange                         |
| Ash (%)          | 0.95                           |
| Proteins (%)     | 11.34                          |
| Total lipids (%) | 14.84                          |
| Total sugars (%) | 32.16                          |
| Fructose (%)     | 15.33                          |
| Glucose (%)      | 14.60                          |
| Sucrose (%)      | 2.23                           |

6. Viburnum (*Viburnum* spp.), collected from: CR

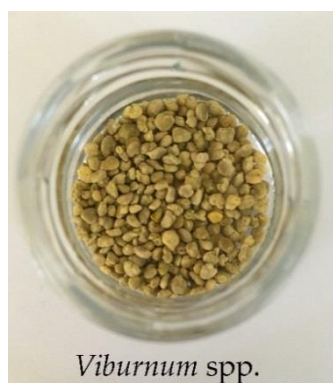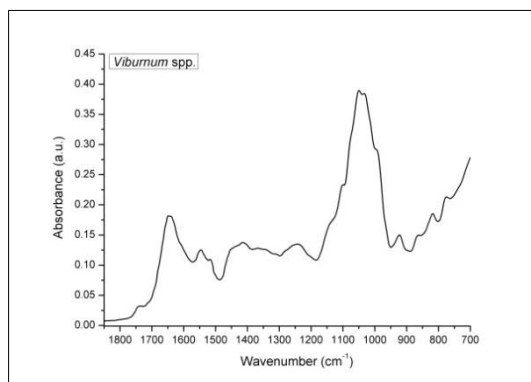

|                  |                      |
|------------------|----------------------|
| Botanical origin | <i>Viburnum</i> spp. |
| Colour           | Yellow               |
| Ash (%)          | 2.45                 |
| Proteins (%)     | 20.28                |
| Total lipids (%) | 7.17                 |
| Total sugars (%) | 36.94                |
| Fructose (%)     | 12.33                |
| Glucose (%)      | 9.68                 |
| Sucrose (%)      | 14.93                |

**7. Persian/English walnut (*Juglans regia* L.); collected from: CR, MR**

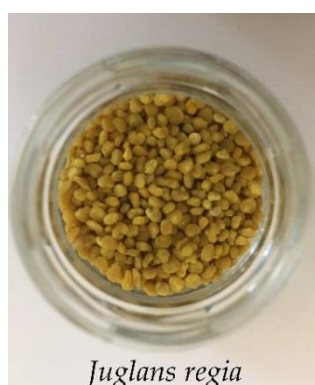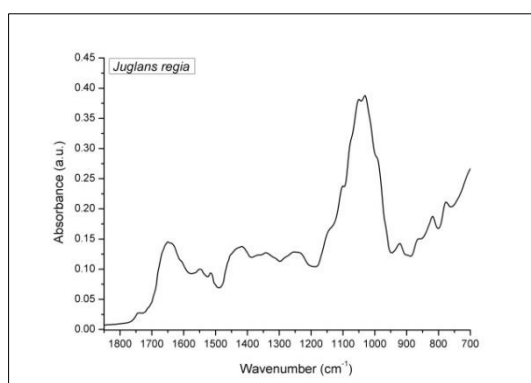

|                  |                         |
|------------------|-------------------------|
| Botanical origin | <i>Juglans regia</i> L. |
| Colour           | Yellow                  |
| Ash (%)          | 1.61.                   |
| Proteins (%)     | 12.70                   |
| Total lipids (%) | 12.80                   |
| Total sugars (%) | 38.17                   |
| Fructose (%)     | 16.65                   |
| Glucose (%)      | 14.16                   |
| Sucrose (%)      | 7.36                    |

**8. Common ash (*Fraxinus excelsior* L.); collected from: CR**

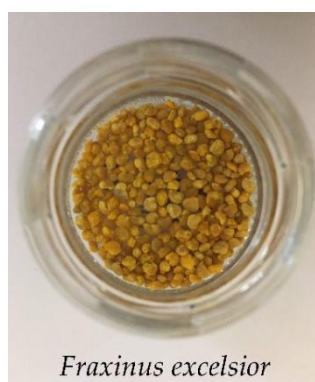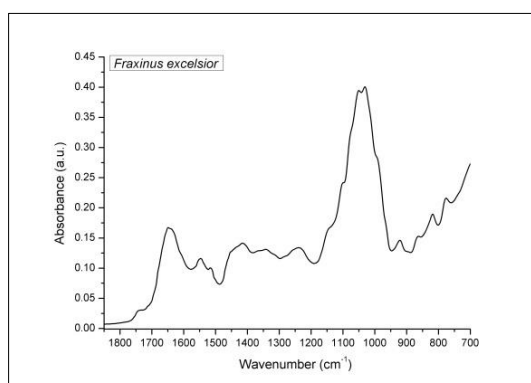

\*No data available for nutritional values

9. Rough hawk's beard (*Crepis biennis* L.); collected from: CR, MR, AR

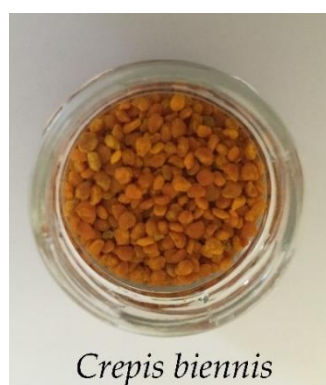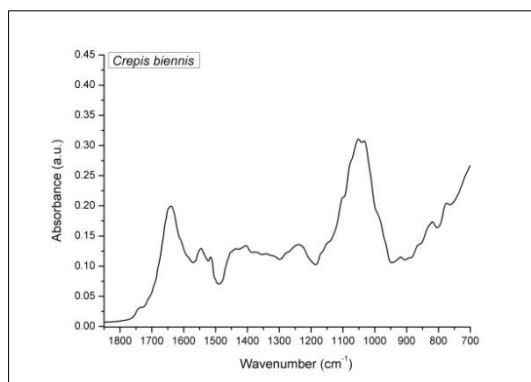

|                  |                          |
|------------------|--------------------------|
| Botanical origin | <i>Crepis biennis</i> L. |
| Colour           | Orange                   |
| Ash (%)          | 1.29                     |
| Proteins (%)     | 13.70                    |
| Total lipids (%) | 11.96                    |
| Total sugars (%) | 33.04                    |
| Fructose (%)     | 16.57                    |
| Glucose (%)      | 12.80                    |
| Sucrose (%)      | 3.67                     |

10. Meadow buttercup (*Ranunculus acris* L.), collected from: CR

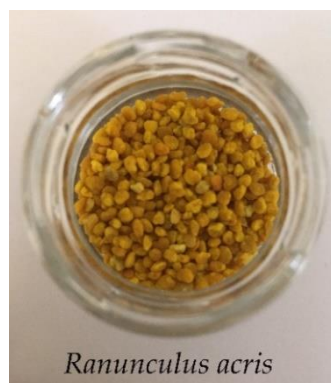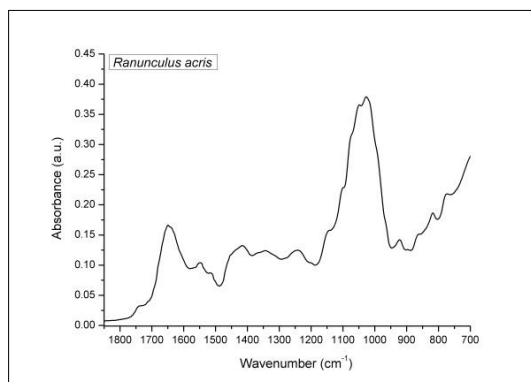

\*No data available for nutritional values

**11. Chives (*Allium schoenoprasum* L.); collected from: CR**

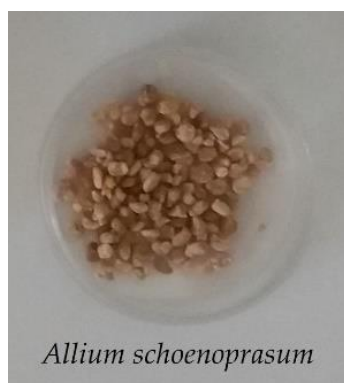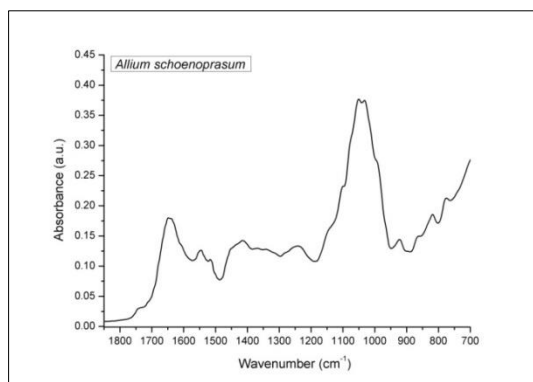

\*No data available for nutritional values

**12. Scots pine (*Pinus sylvestris* L.); collected from: CR, MR**

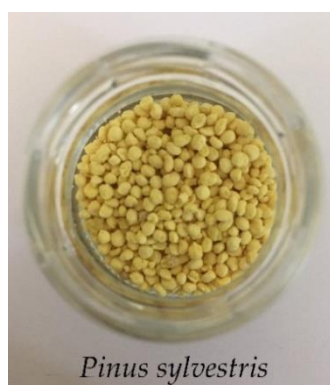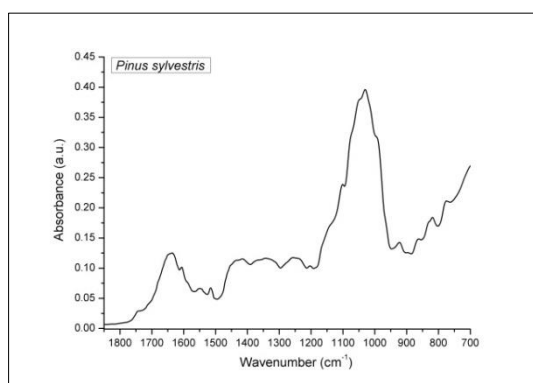

\*No data available for nutritional values

**13. Common poppy (*Papaver rhoeas* L.); collected from: CR, AR**

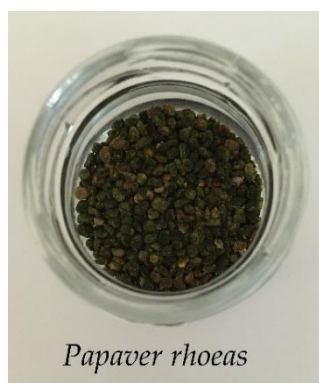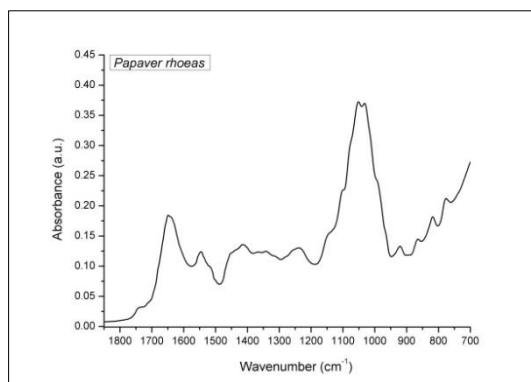

|                  |                          |
|------------------|--------------------------|
| Botanical origin | <i>Papaver rhoeas</i> L. |
| Colour           | Dark brown               |
| Ash (%)          | 1.70                     |
| Proteins (%)     | 18.60                    |
| Total lipids (%) | 6.14                     |
| Total sugars (%) | 39.16                    |
| Fructose (%)     | 21.00                    |
| Glucose (%)      | 14.82                    |
| Sucrose (%)      | 3.34                     |

**14. Common dogwood (*Cornus sanguinea* L.); collected from: CR**

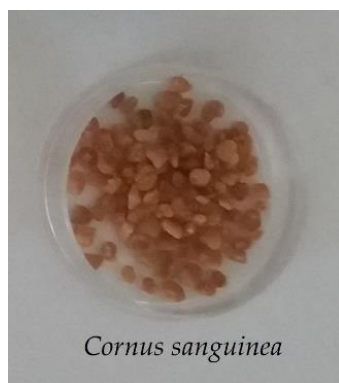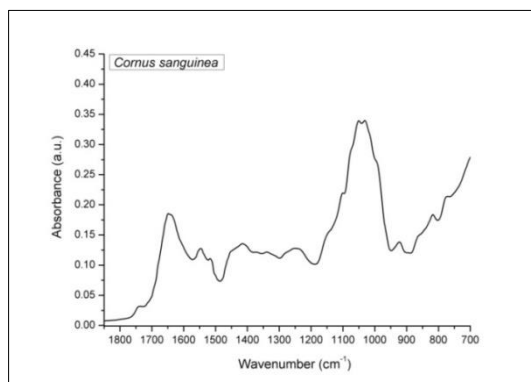

|                  |                            |
|------------------|----------------------------|
| Botanical origin | <i>Cornus sanguinea</i> L. |
| Colour           | Pastel yellow              |
| Ash (%)          | 2.57                       |
| Proteins (%)     | 14.80                      |
| Total lipids (%) | 8.54                       |
| Total sugars (%) | 30.92                      |
| Fructose (%)     | 13.66                      |
| Glucose (%)      | 10.19                      |
| Sucrose (%)      | 7.07                       |



**15. Black locust (*Robinia pseudoacacia* L.); collected from: CR**

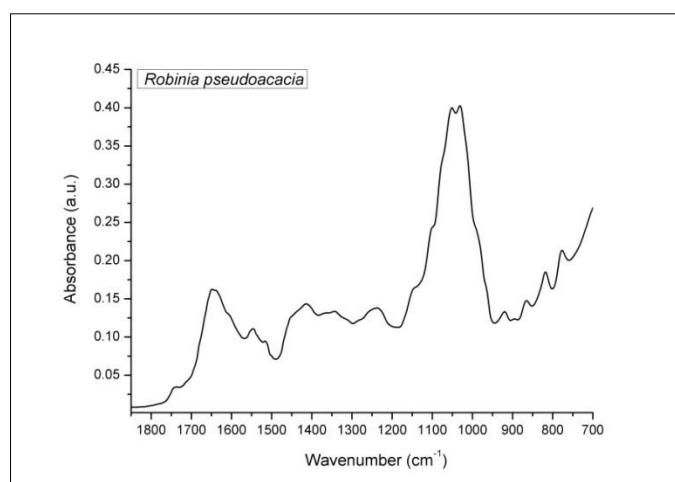

\*No data available for nutritional values

**16. Blackberry (*Rubus* spp.), collected from: CR**

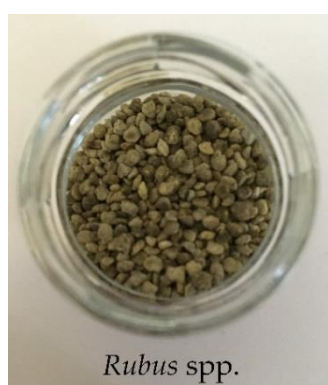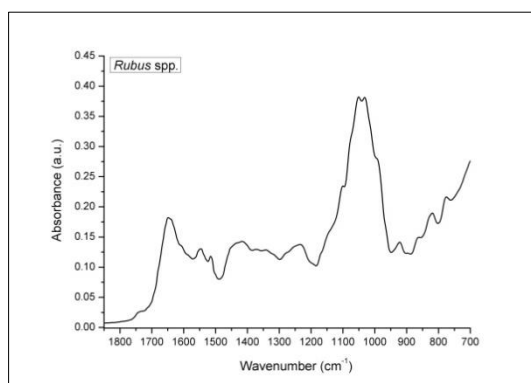

\*No data available for nutritional values



**17. Wild cherry (*Prunus avium* L.), collected from: MR**

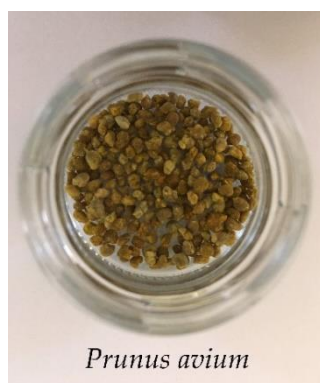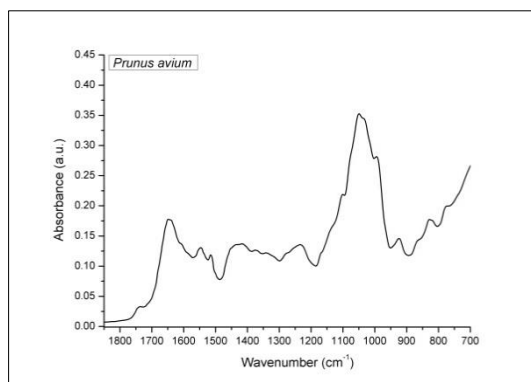

|                  |                        |
|------------------|------------------------|
| Botanical origin | <i>Prunus avium</i> L. |
| Colour           | Oker                   |
| Ash (%)          | 3.22                   |
| Proteins (%)     | 18.56                  |
| Total lipids (%) | 7.69                   |
| Total sugars (%) | 33.84                  |
| Fructose (%)     | 10.47                  |
| Glucose (%)      | 8.30                   |
| Sucrose (%)      | 15.07                  |

**18. Downy oak (*Quercus pubescens* Willd.); collected from: MR, AR**

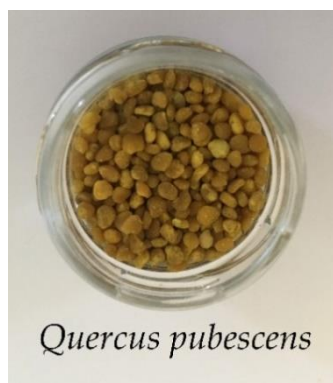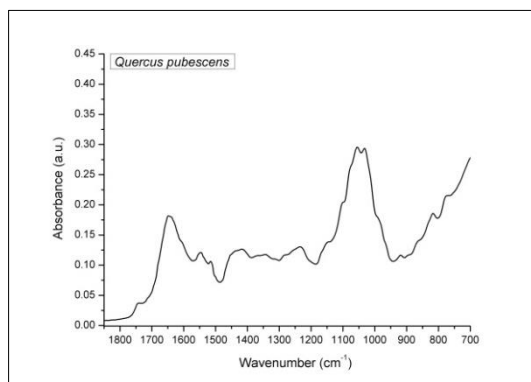

|                  |                                 |
|------------------|---------------------------------|
| Botanical origin | <i>Quercus pubescens</i> Willd. |
| Colour           | Dark yellow                     |
| Ash (%)          | 1.69                            |
| Proteins (%)     | 13.55                           |
| Total lipids (%) | 8.54                            |
| Total sugars (%) | 36.17                           |
| Fructose (%)     | 16.99                           |
| Glucose (%)      | 13.41                           |
| Sucrose (%)      | 5.77                            |

**19. Dropwort (*Filipendula vulgaris* Moench); collected from: MR**

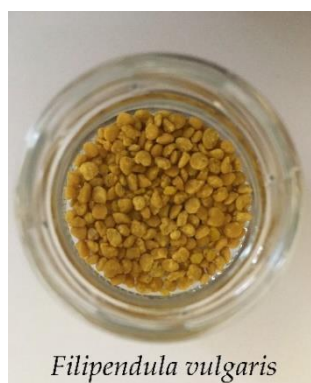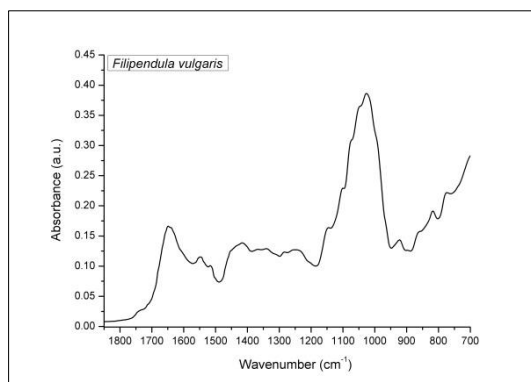

|                   |                                    |
|-------------------|------------------------------------|
| *Botanical origin | <i>Filipendula vulgaris</i> Moench |
| Colour            | Yellow                             |
| Ash (%)           | 1.71                               |
| Proteins (%)      | 11.80                              |
| Total lipids (%)  | 3.72                               |
| Total sugars (%)  | 35.13                              |
| Fructose (%)      | 15.88                              |
| Glucose (%)       | 13.19                              |
| Sucrose (%)       | 6.06                               |

**20. Alfalfa (*Medicago sativa* L.); collected from: MR**

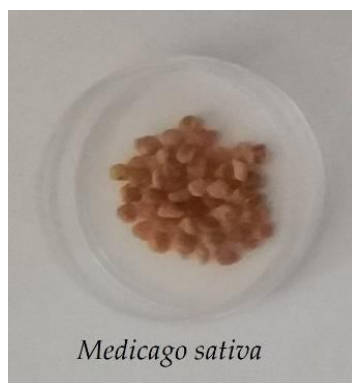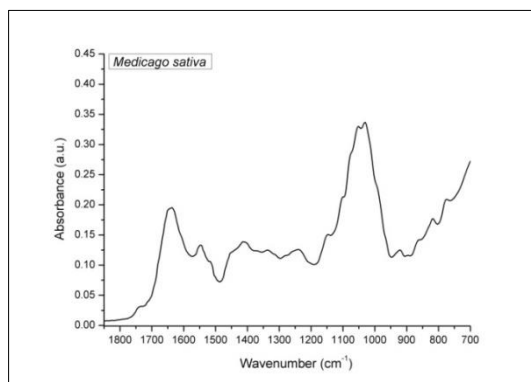

|                  |                           |
|------------------|---------------------------|
| Botanical origin | <i>Medicago sativa</i> L. |
| Colour           | Dark yellow               |
| Ash (%)          | 2.36                      |
| Proteins (%)     | 19.66                     |
| Total lipids (%) | 7.40                      |
| Total sugars (%) | 29.94                     |
| Fructose (%)     | 15.63                     |
| Glucose (%)      | 11.80                     |
| Sucrose (%)      | 2.51                      |

**21. Fiddleneck (*Phacelia tanacetifolia* Benth.); collected from: MR**

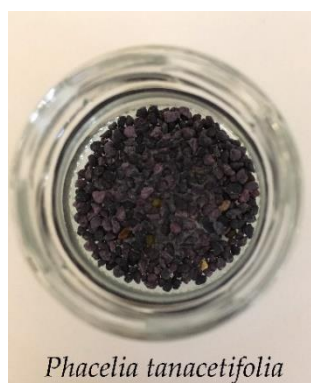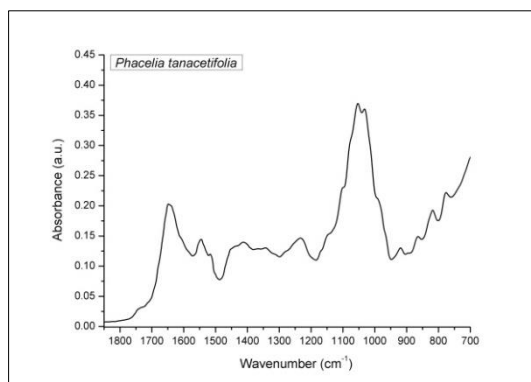

|                  |                                      |
|------------------|--------------------------------------|
| Botanical origin | <i>Phacelia tanacetifolia</i> Benth. |
| Colour           | Purple                               |
| Ash (%)          | 2.24                                 |
| Proteins (%)     | 21.68                                |
| Total lipids (%) | 4.82                                 |
| Total sugars (%) | 38.81                                |
| Fructose (%)     | 20.00                                |
| Glucose (%)      | 15.23                                |
| Sucrose (%)      | 3.58                                 |

**22. Mahaleb cherry/St. Lucie's cherry (*Prunus mahaleb* L.); collected from: AR**

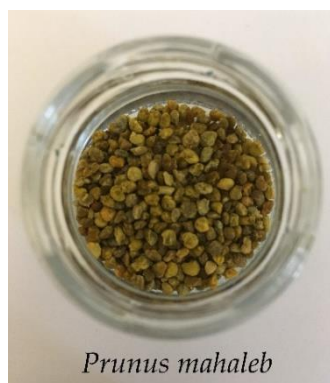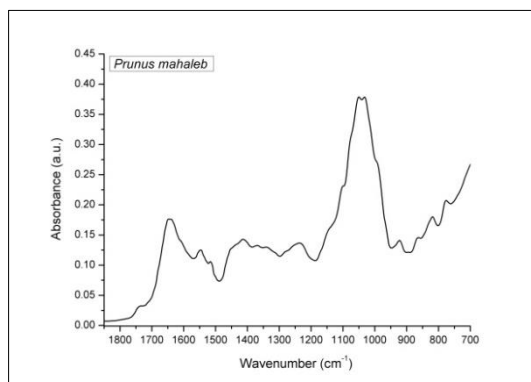

|                  |                          |
|------------------|--------------------------|
| Botanical origin | <i>Prunus mahaleb</i> L. |
| Colour           | Pastel orange            |
| Ash (%)          | 2.70                     |
| Proteins (%)     | 19.40                    |
| Total lipids (%) | 7.52                     |
| Total sugars (%) | 35.33                    |
| Fructose (%)     | 12.37                    |
| Glucose (%)      | 10.43                    |
| Sucrose (%)      | 12.53                    |

**23. Perfoliate alexanders (*Smyrniium perfoliatum* L.); collected from: AR**

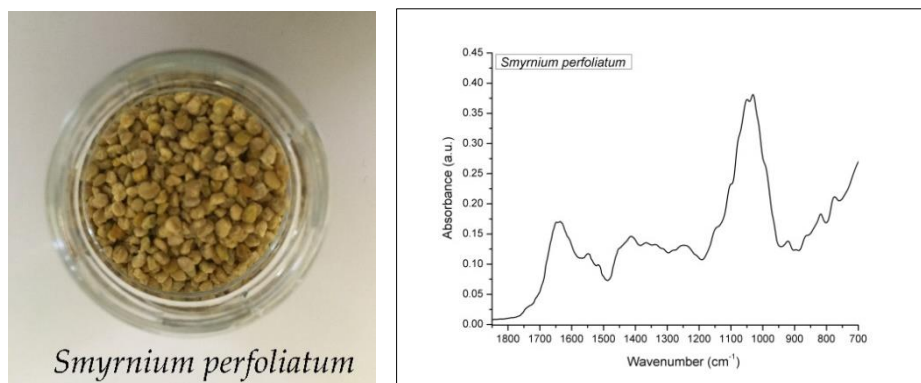

\*No data available for nutritional values

**24. Yellow sweet clover (*Melilotus officinalis* (L.) Pall.); collected from: AR**

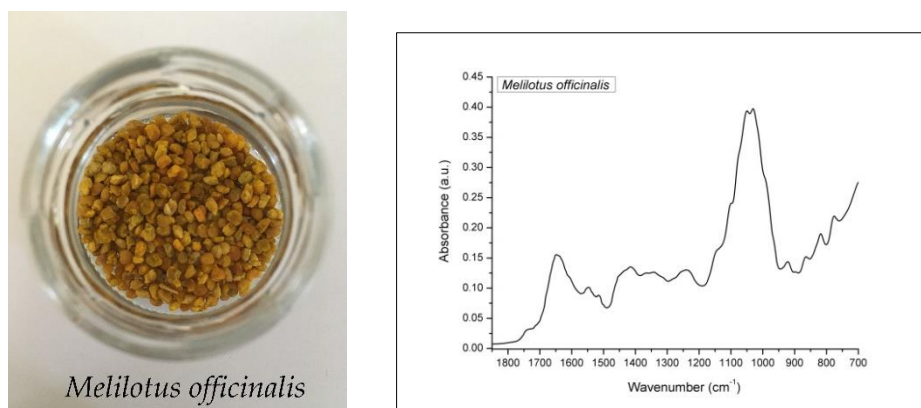

\*No data available for nutritional values

**25. Spiny plumeless thistle (*Carduus acanthoides* L.); collected from: AR**

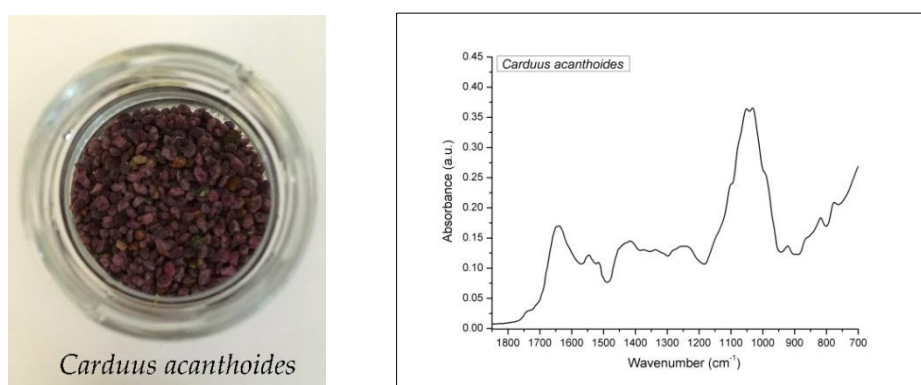

\*No data available for nutritional values

**26. Mouse-ear chickweed (*Cerastium* spp.); collected from: AR**

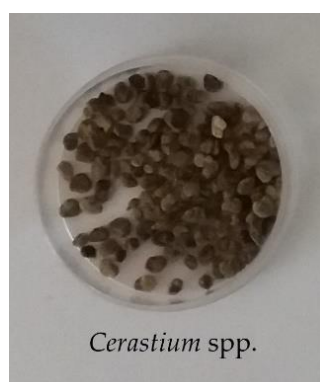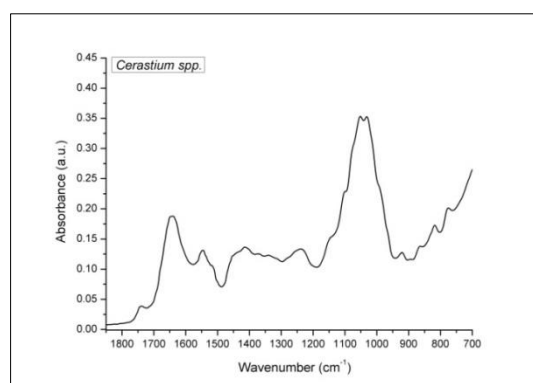

\*No data available for nutritional values

**27. Wild/yellow mignonette (*Reseda lutea* L.); collected from: AR**

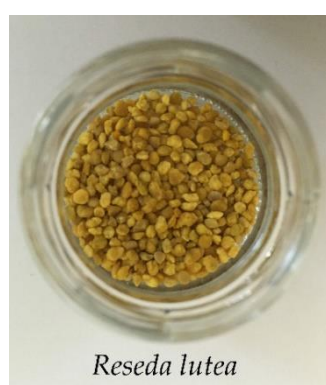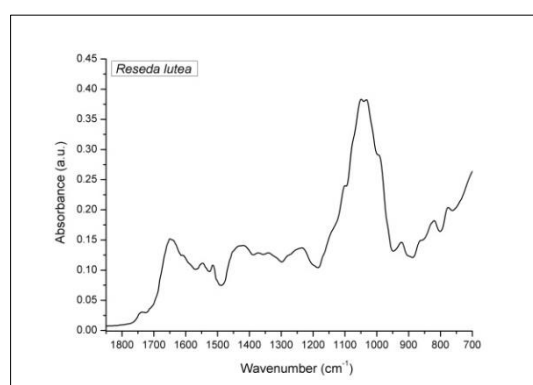

\*No data available for nutritional values

**28. Bladder campion (*Silene vulgaris* (Moench) Garcke); collected from: AR**

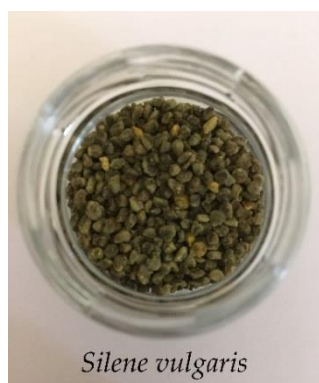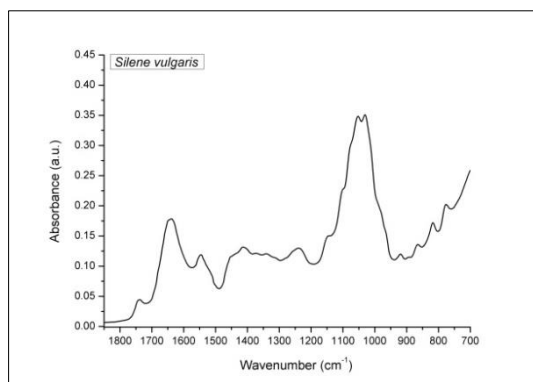

\*No data available for nutritional values

**29. Apple (*Malus spp.*); collected from: AR**

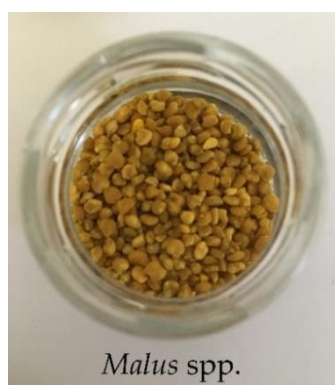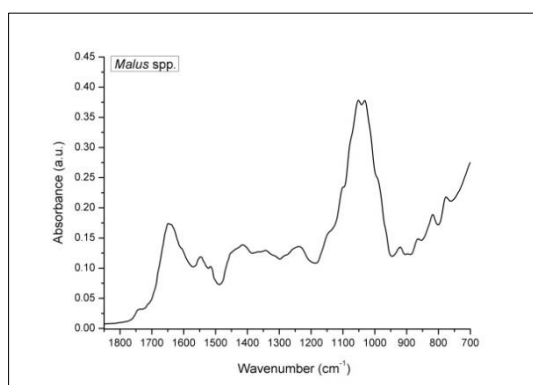

\*No data available for nutritional values
