# Supplementary material for: Characterization of Bee Pollen: Physico-Chemical Properties, Headspace Composition and FTIR Spectral Profiles
Source: MDPI journal article supplement (doi:10.3390/foods10092103), 2021-09-06
Supplement: s1 [file s1]

**Supplementary Material S1.** The effects of classical ANOVA and Kruskal-Wallis one-way ANOVA showing differences between multifloral and unifloral bee pollen originating from different regions for 11 physico-chemical measurement data (moisture, ash, proteins, total lipids, total sugars, fructose, glucose, sucrose, maltose, melezitose, and raffinose content)

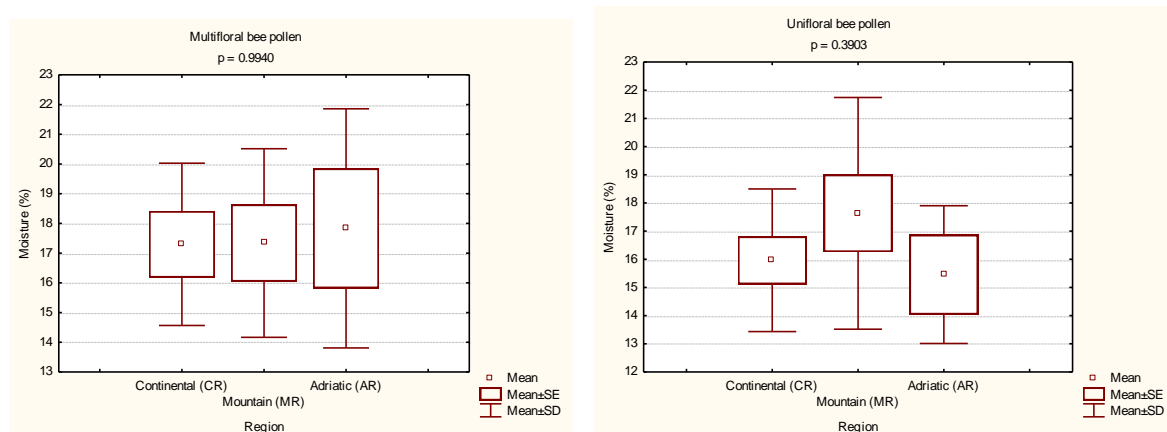

Figure S1.1. Effects of Kruskal-Wallis one way ANOVA showing differences in moisture content between multifloral (left) and unifloral (right) bee pollen collected from three climatic-geographical regions

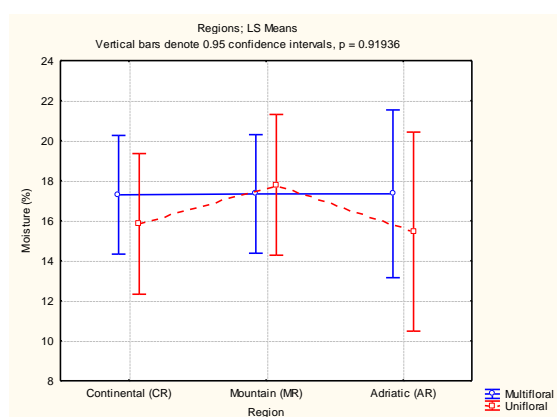

Figure S1.2. Effects of one-way ANOVA showing differences in moisture content between multifloral and unifloral bee pollen collected from three climatic-geographical regions

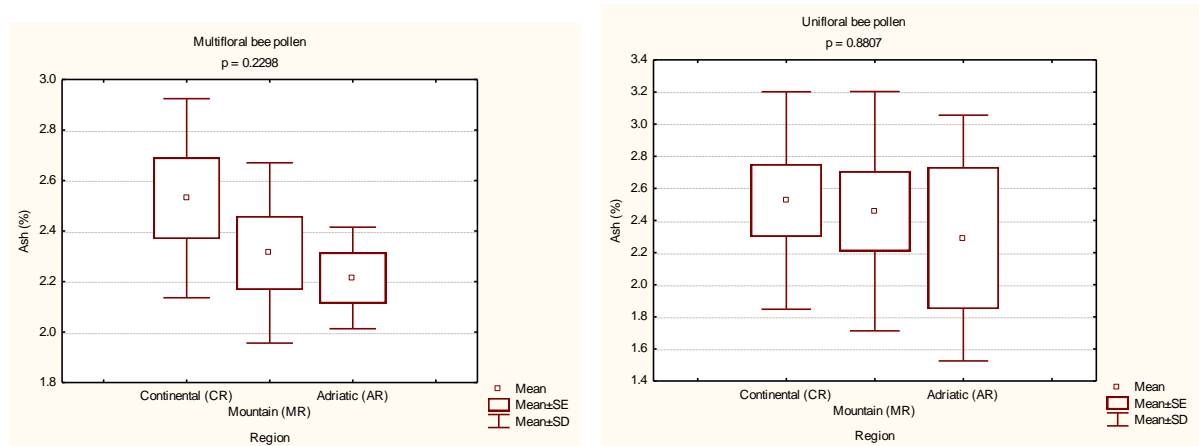

Figure S1.3. Effects of Kruskal-Wallis one way ANOVA showing differences in ash content between multifloral (left) and unifloral (right) bee pollen collected from three climatic-geographical regions

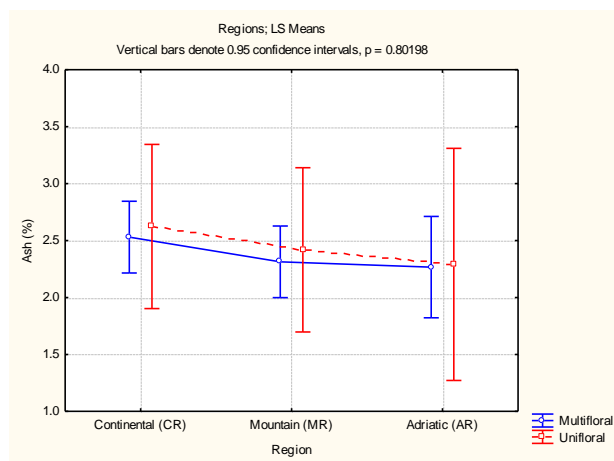

Figure S1.4. Effects of one-way ANOVA showing differences in ash content between multifloral and unifloral bee pollen collected from three climatic-geographical regions

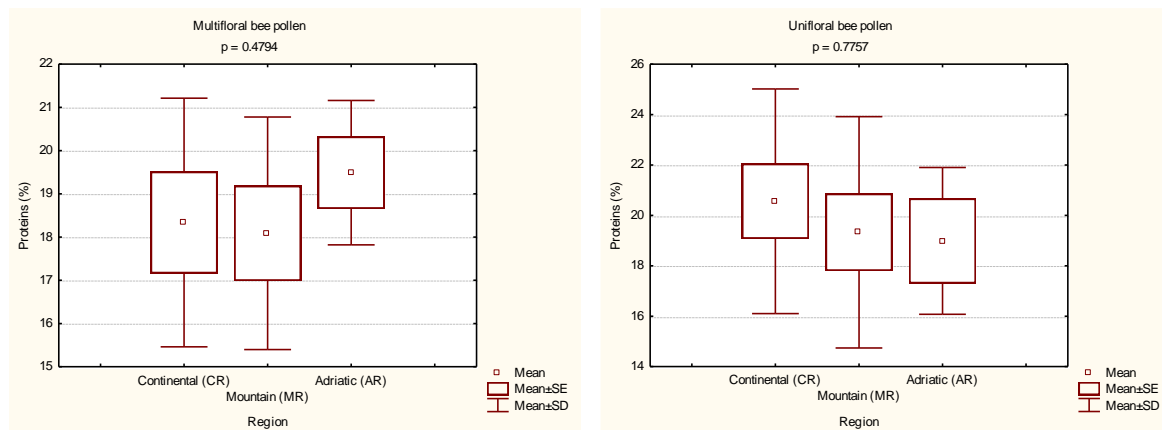

Figure S1.5. Effects of Kruskal-Wallis one way ANOVA showing differences in protein content between multifloral (left) and unifloral (right) bee pollen collected from three climatic-geographical regions

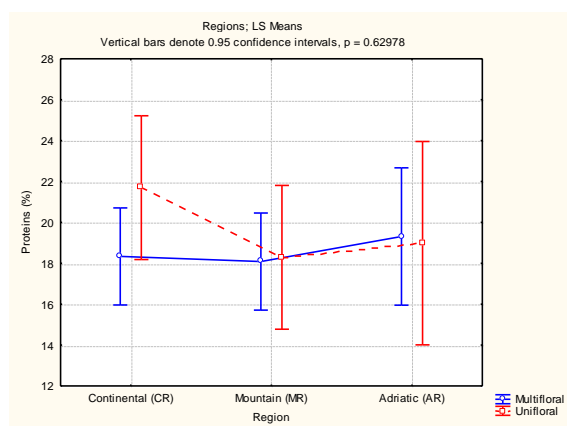

Figure S1.6. Effects of one-way ANOVA showing differences in protein content between multifloral and unifloral bee pollen collected from three climatic-geographical regions

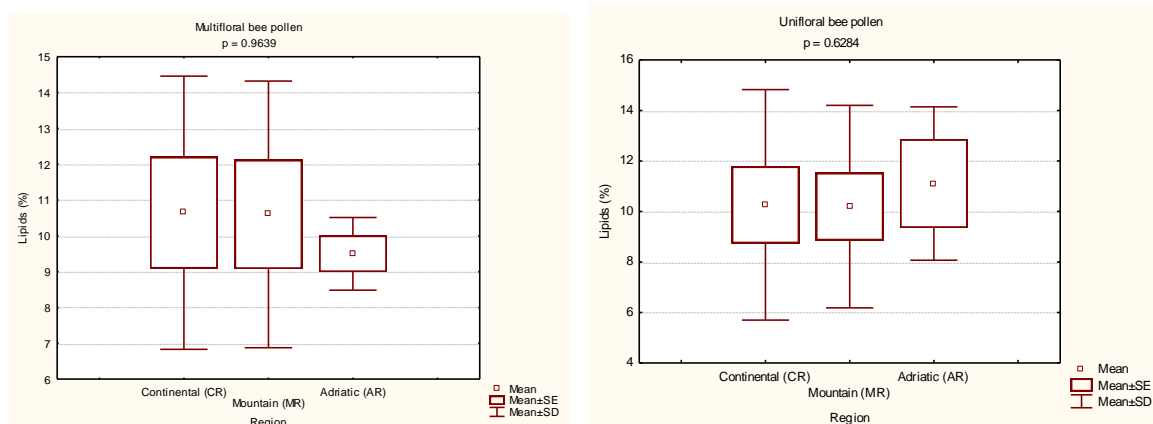

Figure S1.7. Effects of Kruskal-Wallis one way ANOVA showing differences in total lipid content between multifloral (left) and unifloral (right) bee pollen collected from three climatic-geographical regions

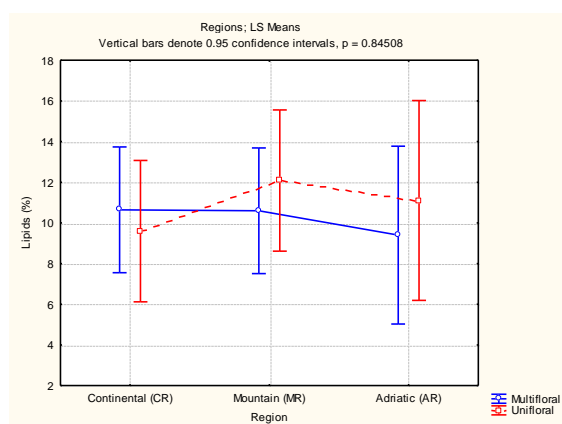

Figure S1.8. Effects of one-way ANOVA showing differences in total lipid content between multifloral and unifloral bee pollen collected from three climatic-geographical regions

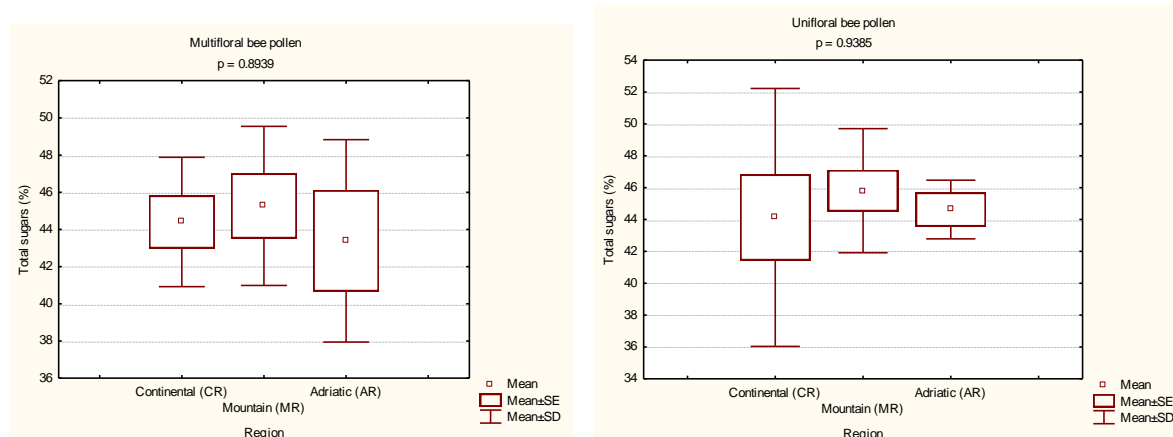

Figure S1.9. Effects of Kruskal-Wallis one way ANOVA showing differences in total sugar content between multifloral (left) and unifloral (right) bee pollen collected from three climatic-geographical regions

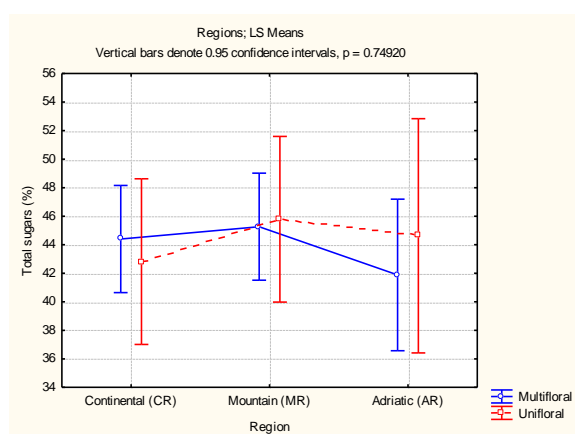

Figure S1.10. Effects of one-way ANOVA showing differences in total sugar content between multifloral and unifloral bee pollen collected from three climatic-geographical regions

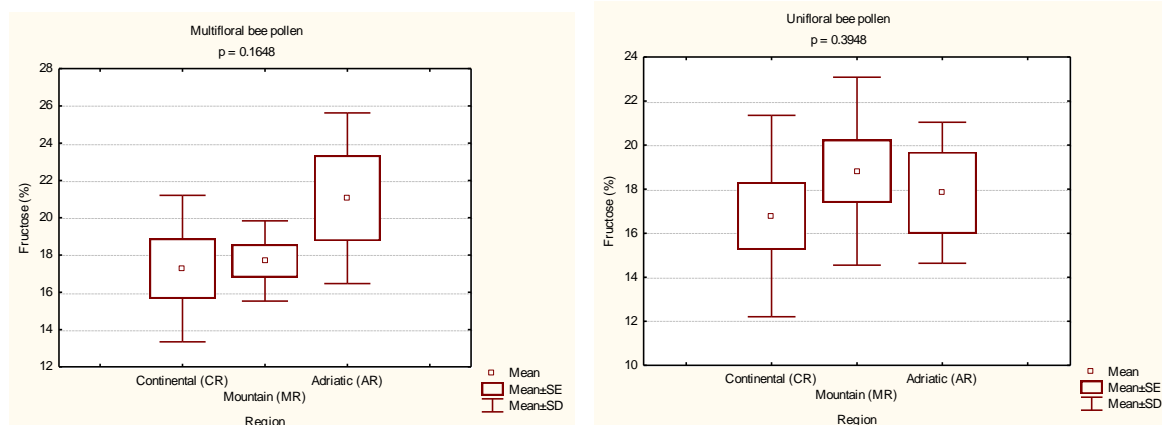

Figure S1.11. Effects of Kruskal-Wallis one way ANOVA showing differences in fructose content between multifloral (left) and unifloral (right) bee pollen collected from three climatic-geographical regions

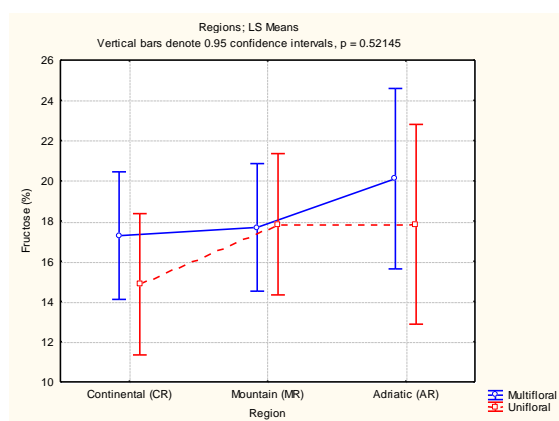

Figure S1.12. Effects of one-way ANOVA showing differences in fructose content between multifloral and unifloral bee pollen collected from three climatic-geographical regions

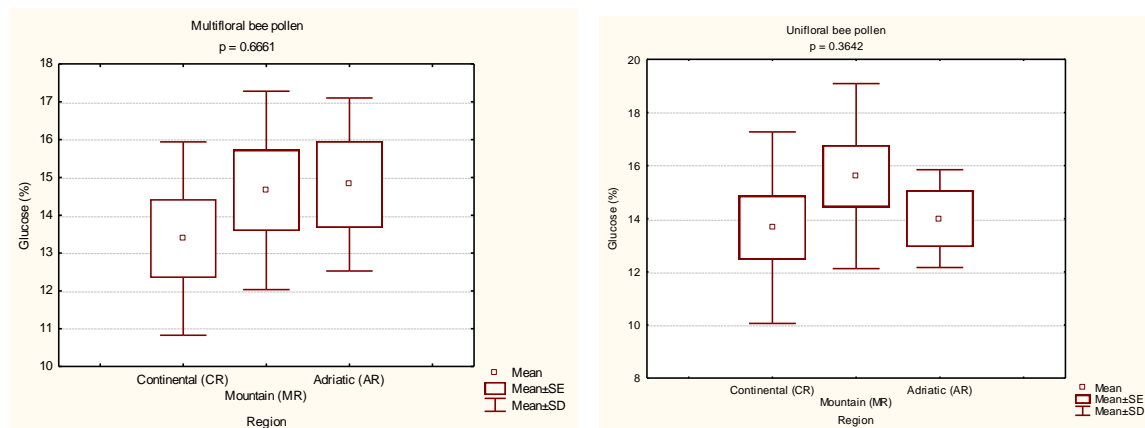

Figure S1.13. Effects of Kruskal-Wallis one way ANOVA showing differences in glucose content between multifloral (left) and unifloral (right) bee pollen collected from three climatic-geographical regions

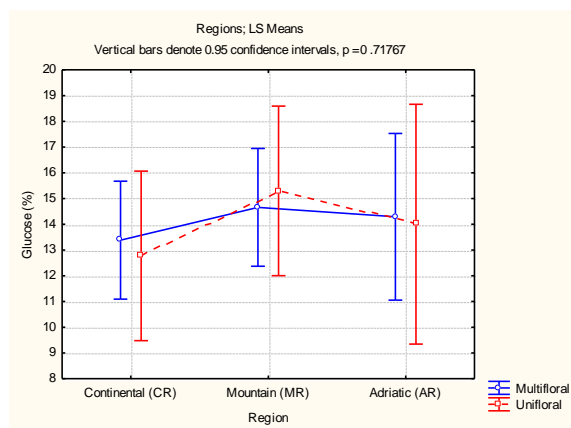

Figure S1.14. Effects of one-way ANOVA showing differences in glucose content between multifloral and unifloral bee pollen collected from three climatic-geographical regions

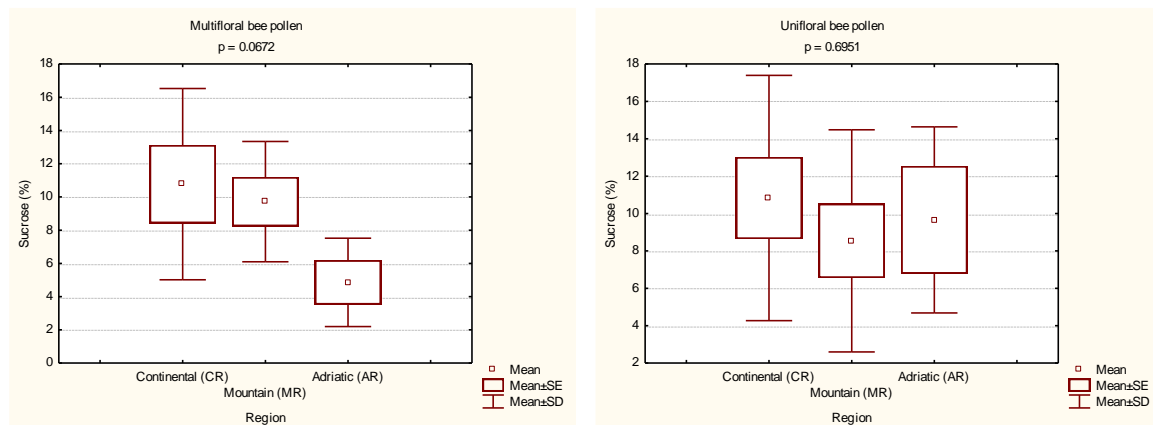

Figure S1.15. Effects of Kruskal-Wallis one way ANOVA showing differences in sucrose content between multifloral (left) and unifloral (right) bee pollen collected from three climatic-geographical regions

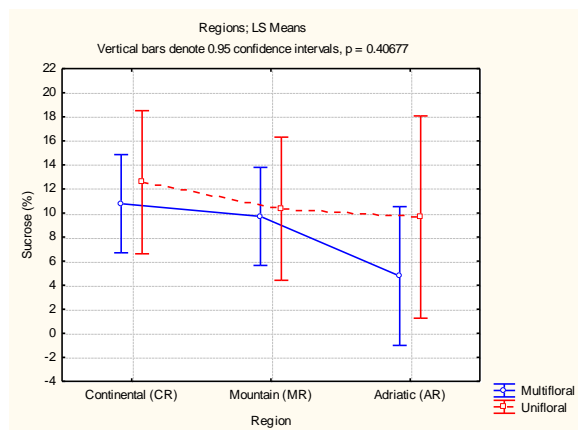

Figure S1.16. Effects of one-way ANOVA showing differences in sucrose content between multifloral and unifloral bee pollen collected from three climatic-geographical regions



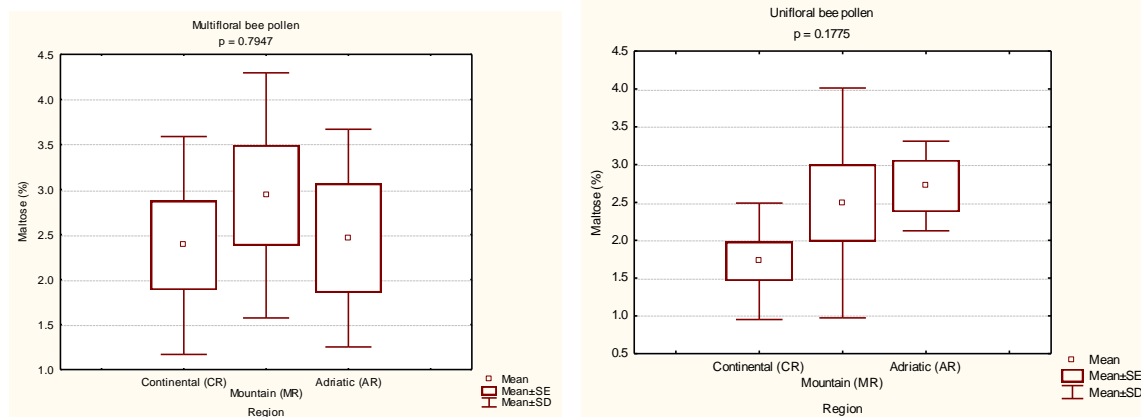

Figure S1.17. Effects of Kruskal-Wallis one way ANOVA showing differences in maltose content between multifloral (left) and unifloral (right) bee pollen collected from three climatic-geographical regions

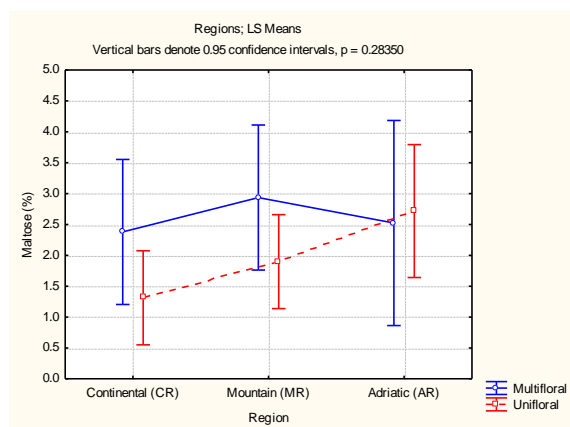

Figure S1.18. Effects of one-way ANOVA showing differences in maltose content between multifloral and unifloral bee pollen collected from three climatic-geographical regions

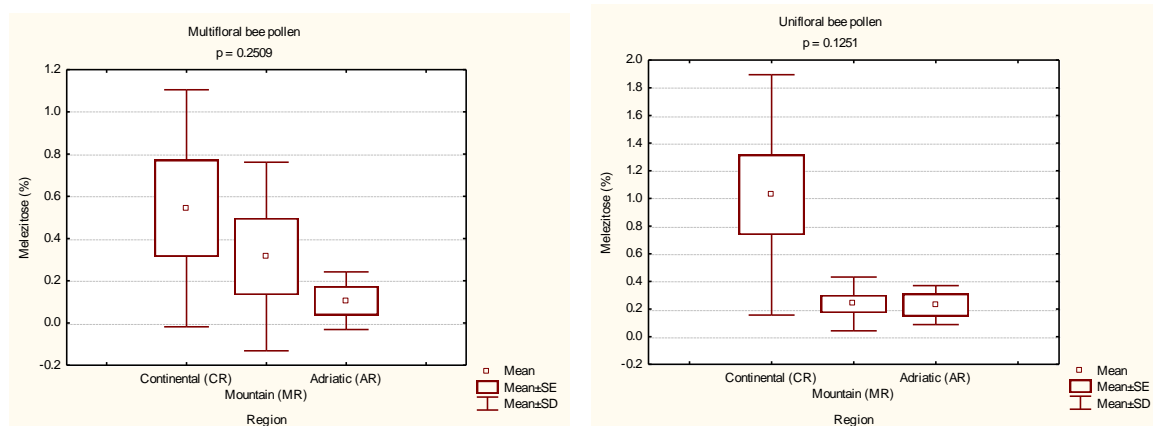

Figure S1.19. Effects of Kruskal-Wallis one way ANOVA showing differences in melezitose content between multifloral (left) and unifloral (right) bee pollen collected from three climatic-geographical regions

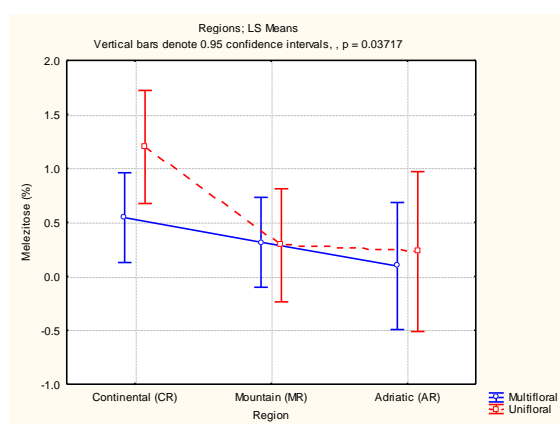

Figure S1.20. Effects of one-way ANOVA showing differences in melezitose content between multifloral and unifloral bee pollen collected from three climatic-geographical regions

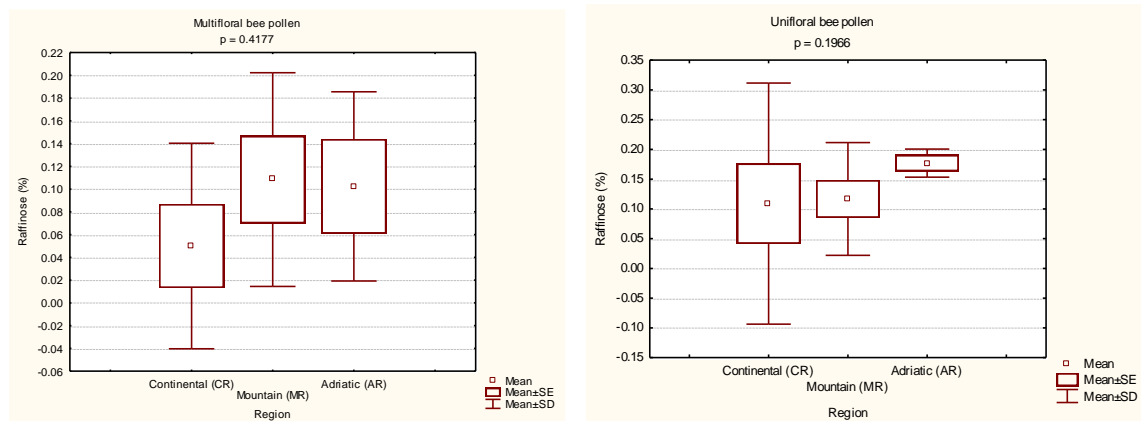

Figure S1.21. Effects of Kruskal-Wallis one way ANOVA showing differences in raffinose content between multifloral (left) and unifloral (right) bee pollen collected from three climatic-geographical regions

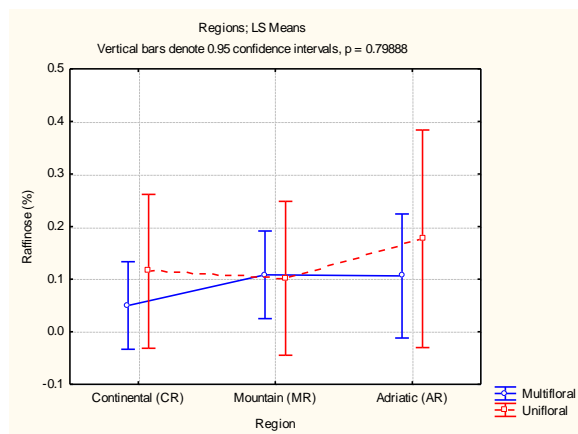

Figure S1.22. Effects of one-way ANOVA showing differences in raffinose content between multifloral and unifloral bee pollen collected from three climatic-geographical regions

**Table S1.** The effects of Paired sample t-test showing statistical significance of differences between determined physico-chemical values of five paired sets of unifloral bee pollen samples (bee pollen of the same botanical origin collected from different climatic-geographical regions), namely *Q. pubescens* bee pollen (from MR and AR), *T. officinale* bee pollen (from CR and MR), *J. regia* bee pollen (from CR and MR), *P. spinosa* bee pollen (from CR and MR), *Salix* spp. bee pollen (CR and MR)

| Effect                      | Moisture     | Ash          | Proteins     | Total lipids | Total sugars | Fructose     | Glucose      | Sucrose      | Malatose     | Melezitose   | Raffinose    |
|-----------------------------|--------------|--------------|--------------|--------------|--------------|--------------|--------------|--------------|--------------|--------------|--------------|
| Pearson Correlation         | -0.005       | 0.906        | 0.880        | 0.826        | 0.889        | 0.838        | 0.654        | 0.834        | 0.993        | -0.083       | 0.977        |
| t statistic                 | 0.704        | 0.068        | -0.073       | 0.241        | 1.426        | 0.096        | 0.139        | 0.034        | 3.393        | 1.517        | 1.380        |
| t Critical one-tail         | 2.132        | 2.132        | 2.132        | 2.132        | 2.132        | 2.132        | 2.132        | 2.132        | 2.132        | 2.132        | 2.132        |
| <b>p (T&lt;=t) one-tail</b> | <b>0.260</b> | <b>0.474</b> | <b>0.473</b> | <b>0.411</b> | <b>0.114</b> | <b>0.464</b> | <b>0.448</b> | <b>0.487</b> | <b>0.014</b> | <b>0.102</b> | <b>0.120</b> |
